# Supplementary material
Source: publisher figshare collection journal article supplement (https://plos.figshare.com/articles/dataset/_/6276563)
Supplement: Supplementary file [file 1]

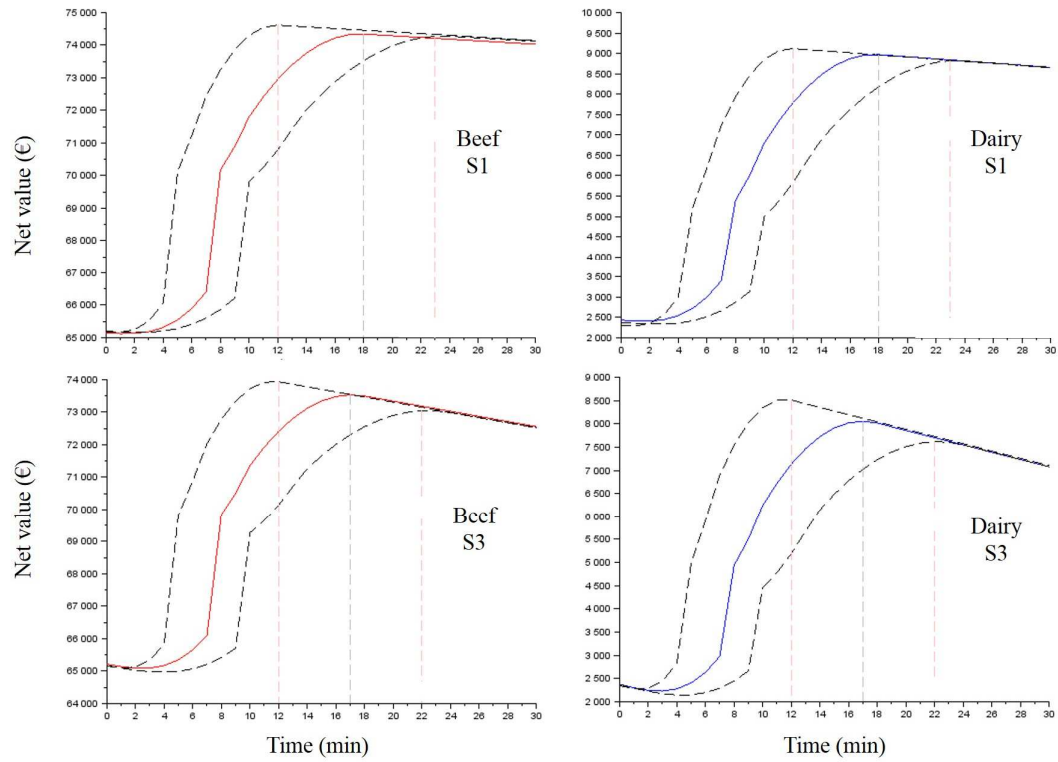

S1 Fig. The net value for expected time spent on colostrum management for the alternative scenarios, labour costs S1 and S3 and the prevalence of FPT without an intervention ( $P_{FPTt=0}$ ) of 50%.

The dotted lines represent the results with the ranges of the function curve  $Eff_i$  (Fig. 2).
