# Supplementary material
Source: publisher figshare collection journal article supplement (https://plos.figshare.com/articles/dataset/_/6276563)
Supplement: Supplementary file [file 1]

S1 Table. Definitions of costs of the disease treatments

|                                            | $C_i$ (unit cost, €) |          |      | BRD  | Ponderation coefficient |            |             |
|--------------------------------------------|----------------------|----------|------|------|-------------------------|------------|-------------|
|                                            | Low                  | Moderate | High |      | Diarrhoea               | Omphalitis | Septicaemia |
| Antibiotic (parenteral route)              | 5                    | 8.5      | 11   | 1    | 0.5                     | 1          | 1           |
| Antibiotic (local route)                   | 0.5                  | 1        | 2    | 0    | 1                       | 0          | 0           |
| No-steroid anti-inflammatory               | 5                    | 8.8      | 14   | 1    | 0.5                     | 0          | 1           |
| Steroid anti-inflammatory                  |                      | 1.24     |      | 0.25 | 0                       | 0          | 1           |
| Solute for rehydration (oral route)        | 1.5                  | 4.13     | 6.5  | 0    | 0.9                     | 0          | 0           |
| Solute for rehydration (intravenous route) | 8                    | 9.3      | 14   | 0    | 0.45                    | 0          | 1           |
| Veterinarian visit to farm                 | 30                   | 40       | 60   | 0    | 0.33                    | 0          | 1           |
| Omphalitis surgery                         | 100                  | 150      | 200  | 0    | 0                       | 0.1        | 0           |
| Cost of labour (15 min)                    |                      | 15.6     |      | 0.25 | 0.25                    | 0          | 0           |

Ponderation coefficients are applied for each disease and each cost item so as to define the overall cost of a given disease. The moderate values are used to calculate the mean disease costs reported in S2 Table. The low and high situation of S1 Table were used to calculate the relative standard deviation (S2 Table) with less than 5% of the values of the law of distribution of S2 Table that go beyond the low and high values of raw data of S1 Table.
