# Supplementary material
Source: publisher figshare collection journal article supplement (https://plos.figshare.com/articles/dataset/_/6276563)
Supplement: Supplementary file [file 1]

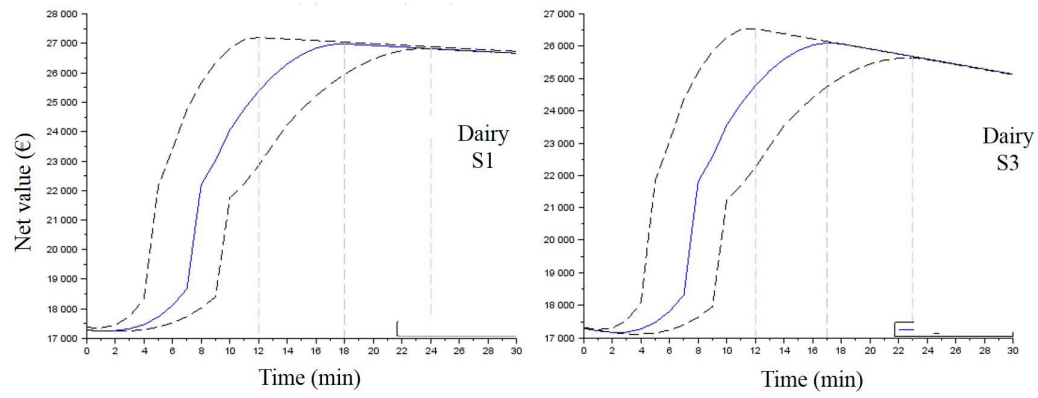

S4 Fig. The net value for the expected time spent on colostrum management for the alternative scenarios, the labour costs S1 and S3, the prevalence of FPT without an intervention ( $P_{\text{FPT}t=0}$ ) of 50% and a market value for dairy of N(330,15) instead of N(125,9).

The dotted lines represent the results with the ranges of the function curve  $Eff_i$  (Fig. 2).
